# Supplementary material for: Identification of an Individualized Prognostic Biomarker for Serous Ovarian Cancer: A Qualitative Model
Source: MDPI journal article supplement (doi:10.3390/diagnostics12123128), 2022-12-12
Supplement: s1 [file s1]

Table S1. Tumor response to chemotherapy drugs in TCGA serous ovarian cancer samples.

| Response | High (All drug) | Low (All drug) | High (Platinum) | Low (Platinum) |
|----------|-----------------|----------------|-----------------|----------------|
| CR*      | 78              | 154            | 74              | 141            |
| PR       | 29              | 17             | 26              | 16             |
| PD       | 20              | 12             | 19              | 11             |
| SD       | 16              | 12             | 14              | 9              |
| Unknown  | 58              | 70             | 32              | 57             |

\*CR, complete response; PR, partial reponse; SD, stable disease; PD, progressive disease.

Table S3. SOV-P20 and its correlation with serous ovarian cancer.

| Gene Symbol     | Relation to serous ovarian cancer                                                                                                                                                    | PMID                  |
|-----------------|--------------------------------------------------------------------------------------------------------------------------------------------------------------------------------------|-----------------------|
| FSTL3>THOP1     | -                                                                                                                                                                                    | -                     |
| DHRS7>DLG3      | -                                                                                                                                                                                    | -                     |
| PDE4B>FOXJ1     | -                                                                                                                                                                                    | -                     |
| TEX261>PYCR1    | -                                                                                                                                                                                    | -                     |
| IGFBP6>PLAGL2   | IGFBP family impact on serous ovarian cancer;<br>PLAGL2 axis mediated ARAP1-AS1 to promote tumorigenesis in ovarian cancer by promoting cell proliferation, migration, and invasion. | 33282953;<br>34149172 |
| NPC1>PIR        | -                                                                                                                                                                                    | -                     |
| LY96>SLC1A5     | -                                                                                                                                                                                    | -                     |
| CPVL>SETD4      | -                                                                                                                                                                                    | -                     |
| PLXNC1>EPHA1    | -                                                                                                                                                                                    | -                     |
| ITGB8>THAP3     | ITGB8 expression increased with DNA amplification in patients with high-grade serous ovarian cancer, significantly reducing overall and progression-free survival.                   | 30531684              |
| ZHX3>NUP160     | -                                                                                                                                                                                    | -                     |
| TCF15>HPCA      | -                                                                                                                                                                                    | -                     |
| AFAP1>LAMP3     | Epithelial ovarian cancer; high expression of LAMP3 was significantly associated with poor survival outcomes.                                                                        | 29526252              |
| SOX1>LCE2B      | SOX1 methylation in patients with ovarian cancer; the higher the risk of recurrence, the shorter the survival time.                                                                  | 18942711              |
| CSF2>ADAM20     | -                                                                                                                                                                                    | -                     |
| ALOX12P2>ATP2C2 | -                                                                                                                                                                                    | -                     |
| TMEM47>SCRIB    | SCRIB as a prognostic biomarker in ovarian cancer.                                                                                                                                   | 32564009              |
| TEX261>FOXJ1    | -                                                                                                                                                                                    | -                     |
| CST6>SLC1A5     | SLC1A5 expression was associated with a worse prognosis in FIGO stage I–II epithelial ovarian cancer.                                                                                | 28609484              |
| GPRC5B>CXCL11   | High-expression CXCL11 serous ovarian cancer had a worse prognosis.                                                                                                                  | 30858874              |

Table S4. Existing models for predicting serous ovarian cancer prognosis.

| Study            | Data source     | Gene signature | PMID     |
|------------------|-----------------|----------------|----------|
| Buttarelli, 2020 | Clinical Trials | MEG3           | 32295169 |
| Zhang, 2020      | Clinical Trials | MAP3K3         | 32269720 |
| Liu, 2020.       | GEO             | 5-gene         | 33281878 |
| Zheng, 2020      | TCGA            | 11-gene        | 33271935 |
| Liu, 2018        | GEO             | 7-gene         | 30585265 |
| Pan, 2020        | TCGA            | 6-gene         | 33193589 |
| Zhang, 2020      | TCGA            | 8-gene         | 32880385 |
| Liu, 2016        | TCGA            | 5-gene         | 27478834 |
| Zhang, 2018      | TCGA            | 2-gene         | 29456732 |
| Zhou, 2019       | TCGA            | 3-gene         | 31579405 |
| Wang, 2019       | TCGA; GEO       | 6-gene         | 31423184 |
| An, 2018         | TCGA; GEO       | 8-gene         | 30410611 |
| Wang, 2019       | TCGA; GEO       | 5-gene         | 30569721 |
| Yang, 2021       | TCGA; GEO       | 7-gene         | 34966691 |
| Wang, 2020       | TCGA; GEO       | 8-gene         | 32186777 |
| Zhang, 2021      | TCGA; GEO       | 17-gene-pairs  | 33543590 |
| Shen, 2019       | TCGA; GEO       | 129-gene       | 30594555 |
| Yang, 2016       | TCGA            | 19-gene        | 27059002 |
| Willis, 2016     | TCGA; HAS       | 32-gene        | 26886260 |
| Wang, 2017       | TCGA; GEO       | 10-gene        | 27846619 |
| Sabatier, 2011   | TCGA            | 7-gene         | 21654678 |
| Millstein, 2020  | GEO             | 101-gene       | 32473302 |
| Lin, 2021        | TCGA; GEO       | 35-gene-pairs  | 33680950 |
| Zhang, 2019      | TCGA; GEO       | 20-gene-pairs  | 31695415 |
