# Supplementary material for: Identification of an Individualized Prognostic Biomarker for Serous Ovarian Cancer: A Qualitative Model
Source: Diagnostics (Basel). 2022 Dec 12;12(12):3128. doi: 10.3390/diagnostics12123128 (PMC9777083; doi:10.3390/diagnostics12123128)
Supplement: Supplementary file 1 [file diagnostics-12-03128-s001.zip › diagnostics-2027900-supplementary.xlsx]

## Sheet: S2
Table S2 The prognosis-related genes in the training set
GSE18520	GSE19829	TCGA-OV
COL4A1	RNF11	GRINA
IFT140	PMM1	RAB40B
NPTX2	GRINA	FBL
MYO1B	SWAP70	ITGA4
LGALS4	ITGAV	TRHR
PRKY	ITGAL	GAP43
GRIN2A	UPK2	HLCS
BCAT1	ATP6V0E1	COX4I1
ZNF157	HMG20B	EDA
BLMH	RFX2	DPT
PTPRD	RFX3	IPO13
EDIL3	IGFBP4	ARHGEF2
KIF25	SEZ6L	ABCB8
MAGEA12	TXNIP	CFD
FBN1	CFLAR	SIX6
SDC1	RAC2	RFX5
CCNE2	VCP	IGFBP6
ZBTB16	ADCY7	FANCI
KLKB1	BRD2	ALOX12P2
ROR2	DNAJA2	CDC5L
KIT	NKX2-8	PBX1
GPD1L	PHYH	TUFM
RHOBTB3	MYO1F	RAD9A
RFTN1	PUF60	ERGIC3
IL12B	GOLGA8A	B3GAT3
GIP	CHD3	DLGAP1
TPBG	NPC1	MBNL2
BIK	FCER1G	CYP27B1
HSD11B2	PRKACA	BRD2
IFI16	ZNF132	AKT1
TYMS	EVI2A	CH25H
CGREF1	EVI2B	HABP2
PAEP	GNA15	CEP57
CDH11	PRKAR1A	EREG
RBM6	MFGE8	PLAUR
PDE1A	IL6ST	LOX
TCERG1	NOS1AP	PRKY
MMP1	BFSP2	GCNT1
PLCB4	MMP20	GCNT2
PTHLH	RND2	ALPL
TUBB2B	NCL	PUF60
GABARAPL1	RPL12	EIF1AX
PARP3	ATP6V0A1	NTRK2
HLA-DOA	STIL	NFKBIL1
ANKRD6	AFF1	COL19A1
COL6A2	CGRRF1	NKRF
SOCS2	SMPDL3A	BMP4
SRPX	PDE4DIP	CHD2
PIAS3	GNAS	CHD5
NFYA	SIX1	SKIV2L
RAI14	FST	DAG1
FCGBP	EPB41L3	SRD5A1
BAMBI	PLEKHM2	PSMB8
SLC19A2	SPTBN2	NUP160
TNC	CRABP2	EIF3K
AEBP1	RREB1	PMVK
TWIST1	TPX2	TAP1
MYBPC1	PRF1	TAP2
POU2F3	RFX1	OVGP1
LIMCH1	RECQL4	CETN2
GEM	ADAM19	DNAJC4
PAPSS2	APOD	MTNR1B
GGH	GNS	PEX3
IL1RL2	CDC34	IL2RG
CPNE6	S100A3	SLC37A4
THBS1	KIAA0513	CDK10
PLS1	E2F2	BFSP1
PLS3	IFITM2	STS
TMEM47	SEC24D	CTNNBIP1
OXSR1	NEK4	PPP3CA
F2RL2	DHPS	ADRA2A
IFI27	COX7A1	DAAM1
S100A5	SAMD4A	ATM
ENPEP	NUDT13	ITGBL1
NR2F1	STX3	IL6R
MIPEP	STAB1	LLGL2
SLC2A5	DRG2	DDX23
SYN3	AURKB	DDX28
BYSL	KRT31	FAM3A
VNN1	IL12RB2	GGPS1
CAPN5	ZNF202	FPR1
GPR18	RBBP7	DAXX
	SLC22A2	NT5E
	MFN1	UNC5C
	LMNB1	VGF
	PPP2R5D	EPB41L3
	ZHX3	EPB41L2
	TFAP4	RECK
	TRIM22	RUNX1T1
	POLB	NDUFS1
	NEB	RABAC1
	ME1	RNF8
	MPZL2	RFX1
	CITED2	GLIPR1
	RPS10	PCOLCE
	NAT9	MTRR
	ACTN3	RECQL
	PTPRC	PITPNM1
	ABLIM3	ADAM12
	HMGN2	PTPRD
	PCYT1A	SNRPC
	TLE1	UCP2
	PLP1	MAST4
	DLGAP4	HIPK1
	MBD3	NFRKB
	MBD2	APOD
	DNAJA1	PAXIP1
	IFT88	MORC3
	IRF8	LGALS3BP
	CLK3	E2F4
	ACVR2A	E2F3
	NRF1	PYCR1
	GUSB	GNG12
	KPNA6	COX6A2
	B4GALT1	DFFB
	SULT2B1	TGM2
	S100A4	MGP
	CD69	NUDCD3
	ZMYND11	GCH1
	RHOBTB2	LUM
	PBXIP1	STX3
	FNTA	TIMP3
	DDAH2	AXL
	STOM	ACOT7
	TAF6L	RBBP8
	TATDN2	KIF22
	GAPDHS	SKAP1
	SCG2	XRCC2
	MGST3	PPP2R5D
	EDC4	ZHX3
	VAPA	SCRG1
	HMGB3	SYNJ2
	MNDA	OSR2
	CD48	NFATC2IP
	WDR77	MTM1
	RFC3	SERPINB1
	KIF14	CX3CR1
	BCL2A1	TNFRSF10D
	GAS2	DES
	NUP62	KLHDC3
	TPMT	KIAA0895
	PPAT	PEX6
	SMARCA4	MPZL2
	FCGR2B	CITED2
	FCGR2A	MAGEA12
	THRB	HLA-G
	TRIM28	HIRA
	NTSR2	RIN2
	SHOC2	WWOX
	BAG2	RPS10
	GMFG	FBN1
	ECM1	SLC9A3R1
	CALCOCO2	SVEP1
	HOXC5	PTPRO
	AMFR	PTPRM
	RPL30	GABRP
	ATF7	FGF8
	BUB1B	NGFR
	TBC1D2B	TTLL4
	WDFY3	COL11A1
	GLS	ALG8
	TMEM11	WIF1
	MAGI2	IRF5
	ERF	IRF4
	ERG	C6orf47
	NCR1	ITK
	NECAP1	OMD
	MTMR6	NOTCH4
	TSC22D3	NOTCH2
	EXOSC2	C4BPA
	TULP1	HSF1
	NMBR	RAPGEF5
	BST2	RLN1
	DEPDC5	EHMT2
	DMXL1	ADIPOR2
	PNMT	TEX261
	PRKCA	HPCA
	ATP10D	CSPG5
	SCRIB	TUBA1B
	PPWD1	TMEM187
	CCDC93	SCGB1A1
	CTSH	USP10
	NDUFA9	PDCD6
	SNRK	TCF25
	POU3F4	TAF6L
	LYZ	GPC1
	TLR2	TBCD
	SLC7A7	SLC28A1
	MARCKSL1	SCG2
	RAD21	MAZ
	UBAC1	MAF
	LST1	ALDH3A2
	VNN2	MGST2
	HNMT	ZNF451
	TSPYL1	TGFBI
	GZMA	RPS6KA2
	GZMK	UTP20
	CREG1	GANAB
	SI	RAB11FIP5
	RBM6	HMGB3
	RBM3	CLIP3
	GPD2	WDR77
	DEFA4	NQO2
	DMXL2	ZWINT
	ARSB	ELK1
	HEXA	NSDHL
	OGT	GAST
	FUT1	PRKG1
	FUT8	PDGFRA
	CYLD	TPM4
	MAD2L1BP	TGFBR2
	ADAR	SH3PXD2A
	SF3A2	FCGR2A
	F13A1	DAP
	YWHAZ	ACSM3
	SSNA1	CUL7
	GLRX	TRIM27
	VAMP5	SLC3A2
	PODXL	BAG1
	AHSA1	MEOX2
	ITSN2	FSCN1
	TBX6	TCAP
	FBXO9	ECM2
	NAV3	DDIT3
	PPIC	FMR1
	CORO1A	RGS4
	NPAS3	RGS2
	SLC18A3	PTP4A3
	OAT	ABHD5
	RB1	CCHCR1
	FSTL3	MAPK13
	LITAF	FZD1
	PI3	FZD5
	GSK3A	AMFR
	SLC6A9	GNAT1
	EPHA4	GNAT2
	COL9A1	HSD11B2
	CREB3L2	GTF2H4
	ASPA	PCDH9
	TAF2	TARBP1
	LCP2	CDC7
	LCP1	LHX2
	FGR	PTGER2
	NEO1	PTGER3
	LY96	B3GALT4
	SNX2	B3GALT5
	SNX7	STK3
	GRIA2	CXCL11
	ASL	CXCL13
	GABARAPL1	TNFRSF8
	TOPBP1	ATR
	SLCO2B1	TYRO3
	TFDP2	GFPT2
	CCR1	PRAME
	CCR6	ESD
	CCR8	TBCC
	CD84	TBCB
	EFNA3	PRSS16
	LRP5	AOAH
	LIMK2	FCHSD2
	MAP2	CYB561
	MDFI	KIN
	PDHX	CRYBB2
	CCDC106	EEF1E1
	DICER1	STXBP1
	ABCC3	STXBP2
	FOLR2	FANCG
	NCBP2	FANCA
	LAPTM5	CA5B
	AGT	CA2
	LILRB2	SUPT3H
	DGAT1	SGSM3
	FOXM1	SCRIB
	AP3D1	WWP1
	NOL3	CTSK
	DPYD	AMMECR1
	HDGF	PRRX1
	ZMPSTE24	EMD
	HSD3B1	AP2S1
	IL10RA	AFF2
	COL16A1	PDPN
	UPP1	PHKA1
	WIPF1	PHKA2
	GLO1	PHF20
	SLC31A2	TOP3B
	INPP5A	PTGFR
	PPM1E	MORF4L2
	PEX10	EIF1
	GIT2	BIRC5
	MPPED2	DMC1
	KLK13	PAFAH1B2
	DENND3	DDX6
	SOCS5	HLA-A
	IL1R2	HLA-F
	AMPH	HLA-E
	LRIG1	PAQR4
	SOX9	NVL
	SMG7	WWTR1
	STARD7	SYNGR2
	ERBB3	NXT2
	AFAP1	DNASE2
	ERBB4	SSBP1
	PSMC3	ARHGEF12
	TRIP13	GPLD1
	CPVL	DLG3
	WDR7	SLC39A7
	DNAJB6	AADAC
	DNAJB5	CDH11
	DIDO1	REN
	CALR	HMBS
	NFYA	TMEM63A
	HELZ	FUT8
	SEC14L2	KIFC3
	SNED1	GTF2F2
	ANXA5	MAD2L1BP
	ANXA4	ZNF184
	MCM6	MOAP1
	MCM4	ZNF239
	MCM2	F13A1
	CD27	ETS1
	TMF1	MMP9
	TM2D1	MMP2
	PGM1	AGER
	ZNF253	WNK1
	ZFYVE16	SHMT2
	TRAF3IP3	APOBEC2
	LTA	SLC9A6
	RIOK3	ESR2
	BANF1	FBXO9
	GAS8	PIN4
	CSF2	FAP
	GATM	CCS
	MYBPC2	RB1
	CDKL2	FSTL3
	SFXN3	FSTL1
	HCLS1	PIR
	NDUFS4	PI3
	POU2F3	UBB
	POU2F1	PCBP3
	FCHO1	ZMYM3
	TOR1AIP1	EPHA4
	ZBTB20	EPHA1
	GBF1	BCHE
	SKI	TFAM
	DDO	TIMM44
	CDC14B	PGAP1
	CDC14A	MFAP5
	ST6GAL1	MFAP4
	AGRN	HBS1L
	GPSM2	APRT
	ZNF365	TNFSF11
	AKT2	TNFSF10
	NCKAP1L	RWDD2A
	NPEPPS	CCT5
	KIF3C	ZC3H3
	NCF2	SLC4A4
	NCF4	SLC4A8
	DEGS1	KNTC1
	EMP3	AQP3
	UBE2G2	ITGB1
	BPHL	ITGB8
	IFNAR1	RNF40
	DIAPH2	LBP
	UROS	SLC12A5
	SOX11	NEO1
	SOX13	XYLT1
	FTL	ALDH5A1
	FTO	TCTA
	KLHL20	STK24
	MDK	PHKG2
	LAMA4	FABP2
	PMP22	ADORA3
	MITF	GABARAPL1
	IGHD	ASAH1
	IGHM	PRR3
	C1QB	FASTK
	VSIG4	SYDE1
	ZFHX3	FURIN
	CBX7	GADD45G
	CBX6	PLK2
	CD247	GMPR
	PFKP	LRRC41
	TNNI3	LSM14A
	METTL1	PSMB9
	B9D1	SLCO2B1
	ICAM2	CCR8
	CYC1	LRP1
	RBM15B	GALNT10
	NDST2	HLA-DOB
	PLK4	CLCC1
	TSPAN4	PPL
	TREH	APEX2
	RPE65	MAPT
	ABL2	ATP2B1
	TMED3	TBX2
	CD52	FN1
	CD53	CEACAM3
	RAB32	C3AR1
	PLS3	LRRC17
	YPEL1	LRRC14
	CD163	LRRC15
	CSF1R	NCAM2
	CLEC2B	POLD2
	GPRASP1	POLD3
	TTK	DICER1
	DNASE1L2	ID1
	GART	MSC
	ZEB2	XBP1
	IBTK	INTS3
	SRPK1	AHDC1
	SLIT3	PDGFA
	EFNB1	PRPS2
	ARL2BP	ABCD2
	SH3BGRL	LCE2B
	TAF5L	ANGPT1
	HMHB1	BAK1
	SERINC1	PPP4C
	AZGP1	SULT1A1
	AMPD3	SH2B1
	PRPF40A	MOXD1
	TNFSF8	CHAF1B
	MMRN1	SASH1
	CD38	TCL1B
	HOXD9	PCK2
	CD3D	KLK8
	FOXJ1	GLRA2
	IFNGR1	PPOX
	XDH	COL16A1
	NEU3	SST
	VDAC3	EPHX1
	SLC6A12	MFNG
	RPL22	CIB1
	MAFK	TRIO
	CREBL2	SVIL
	RBPJ	UQCRB
	ACSL1	CACNA1C
	ACSL3	CACNA1D
	RPL8	GLO1
	RHOH	SLC15A2
	ITM2A	CCDC28A
	SMC4	PPM1G
	AKR1C3	ABCF3
	MOCS3	PAX2
	CD1D	PTPN2
	JAK1	PAX9
	PPARD	C15orf39
	LHFPL2	C2
	PLCG2	TP53I11
	LPIN2	COL1A1
	KLF5	SORBS1
	NAIP	TMEM158
	IKBKB	AP3B2
	DHRS7	P4HB
	IMPA2	COL6A1
	PHGDH	UBR2
	PLAGL1	NUCB2
	SLC1A5	LRIG2
	MTDH	SNCA
	CLC	AIFM1
	LMAN2	OVOL2
	ADD3	CXCL12
	MAP3K5	SDHA
	FMO1	SDHB
	SETD3	SMG7
	NPPB	FAM3C
	ST8SIA4	OSBPL3
	SRGN	EEF1A1
	CD180	FRMPD1
	WAS	ZNF124
	DPP4	GJB1
	DFFA	PSMC4
	LEPROT	TRIP11
	RNASE4	TRIP13
	RNASE6	TGM5
	CDSN	BTN3A1
	DUSP3	CDKN2B
	RBL2	CCL7
	AUTS2	HSBP1
	AKAP11	SGSH
	HTRA1	CALR
	LAPTM4B	MPST
	ALOX5AP	TOE1
	CXCR6	GSTP1
	APPBP2	TBXAS1
	ARSD	CHI3L2
	RAD17	TEKT2
	ARHGEF6	KIAA0753
	PALM	PHTF1
	MYH3	ADAM20
	VGLL4	PALLD
	POLA2	RBMS1
	MEGF6	ANXA2
	ARR3	ANXA4
	MAPRE2	MCM6
	AQP6	MCM5
	PATZ1	MCM3
	STX2	TBL2
	MED22	PYGB
	MSR1	FCGBP
	EPHB2	KCNN3
	EPHB3	SNRPA1
	MELK	FOXK2
	CD14	SLC35A1
	KCNS3	LSAMP
	S100A10	PAK4
	DYRK2	HOXD10
	SPOCK3	NUP153
	CLDN10	MAPK4
	BCL11A	WTAP
	DPY19L4	KRT6A
	FKBP2	CCL13
	TYROBP	UST
	PLXNC1	RNF167
	WDR37	ZBTB48
	PARVA	ATRNL1
	ALDH9A1	OPN1SW
	YAP1	MMP12
	SCN8A	LRRN3
	ST6GALNAC2	BLM
	LILRA2	BLK
	ARID1A	TCN1
	CYB5R3	GPRC5B
	ADCY9	PYROXD1
	CIRBP	OFD1
	ITIH4	LMOD1
	CSTA	GYG2
	SOX1	GAS8
	PITPNA	TWIST1
	PHKB	GAS1
	TPP1	HYOU1
	IDI1	ZNF165
	MAN1A2	SCGB1D2
	SURF2	VPS11
	CD4	CSTF2
	PDE4B	CLN3
	MAP2K2	GEM
	BTN2A1	CDC14A
	SEC31B	GPR171
	SUCLG2	PHF1
	GPR176	ST6GAL1
	NMT2	ERN1
	GLI2	CHMP1A
	PTTG1IP	RARRES2
	ENPP2	GPSM3
	CSNK2A1	DRD2
	ZZEF1	CASP8
	CRYAA	AKT2
	RGS10	ENTPD5
	NDN	PROCR
	DNM1L	MUTYH
		EMP1
		BPHL
		GPM6B
		DIAPH2
		GATA4
		TCF15
		SERPINE1
		TNNT2
		PDLIM3
		KLHL25
		PMP22
		TAF1C
		GSTZ1
		QKI
		TRIM24
		HSD17B1
		HSD17B6
		PDZD2
		ALDH3B2
		HGS
		HGF
		ZNF467
		TNFRSF25
		VSIG4
		ARL4C
		CBX5
		FASTKD2
		PSEN2
		ZFP36
		ERCC1
		ELAVL4
		MRPS12
		MRPS11
		THOP1
		SSR4
		CACNG1
		LAS1L
		CARM1
		NKX3-2
		ICAM3
		NEFM
		ATP1B2
		TSPAN7
		PCMT1
		THBS2
		TMED1
		HMGA1
		ISG20
		RAB32
		PLS1
		PDIA4
		TRIM26
		ITPKC
		NET1
		ITPK1
		GTF3C1
		XPO6
		SPARC
		CALB2
		SRPK1
		BDKRB1
		ZNF688
		NFX1
		SLIT2
		THAP3
		FABP7
		SERINC1
		SERINC3
		MDN1
		MMP15
		CYLC2
		AREG
		RPS6KB2
		CDKN1B
		RPS4X
		AP3S1
		VASP
		LAMP3
		CD38
		ZFX
		ZFR
		TOPORS
		DNMT1
		SLC25A1
		CD3E
		CD3G
		FOXJ1
		HCP5
		TAPBP
		ALDH1A3
		EYA4
		SMARCB1
		OAZ3
		MED14
		KRAS
		ARPC1A
		ADAM9
		TRIM38
		NEBL
		INHA
		UGT8
		KALRN
		PRPF19
		TRAF6
		LASP1
		CCDC86
		ZSCAN12
		NUAK1
		POLR1C
		COL3A1
		HIP1R
		WDR46
		HOXB2
		HOXB3
		SPDEF
		COL10A1
		DDB2
		DDB1
		APOBEC3G
		APOBEC3C
		KLF1
		SLC1A4
		IKBKG
		MICB
		PCYT2
		PHGDH
		SNAI2
		PLAGL2
		SYF2
		CEACAM1
		ZNF623
		DDHD2
		FMO2
		IDH2
		PASK
		SETD4
		ECH1
		MAN2A2
		ST8SIA1
		STX11
		LIPC
		RNASE2
		CD5
		FBXL4
		CCR7
		FGF9
		FGF7
		OLFML2B
		DEFB1
		DUSP9
		ELN
		HSPA1L
		PTGIS
		MPHOSPH6
		SAC3D1
		BYSL
		SLC20A2
		NPY
		ACTA2
		VEGFC
		FLOT1
		AKAP12
		HTRA1
		ARID5B
		GLS2
		ALOX5AP
		TEAD1
		CXCR6
		EXOC3
		DHX38
		ALDOA
		KEAP1
		POLA2
		SLC5A1
		PRSS8
		NR4A3
		CUL4B
		AQP1
		MSR1
		RBM38
		ZNF32
		SH3GL2
		SLC10A3
		DCLRE1A
		KCNS3
		AHCYL1
		ACP2
		GRK6
		OTC
		CAPN9
		KLHL4
		KDELR3
		HIRIP3
		ST14
		SPOCK2
		SPOCK3
		BTN3A3
		FNBP4
		SYNE2
		GCLC
		STK19
		FKBP5
		LAT
		PLXNC1
		SLC22A3
		FLNC
		PARVA
		RXRB
		ABCA4
		ABCA5
		NBEAL2
		DKK4
		LILRA2
		NFE2L3
		CDT1
		CST6
		RAD52
		BGN
		ATP2C2
		GPAA1
		GPT
		TSHR
		GBP2
		STK38
		LCK
		STAT2
		HTATSF1
		MTMR1
		PLN
		MAP3K11
		BTN2A1
		NR1H3
		SEC31B
		ZNF76
		PART1
		BTN3A2
		ETV1
		FAM8A1
		RGS14
		RGS11
		VCAN
		ELF2
		ELF4
		SELL
		SLC7A11
		SELP
